# Supplementary material for: miR-514a regulates the tumour suppressor NF1 and modulates BRAFi sensitivity in melanoma
Source: PubMed Central journal article supplement (PMC4627343; doi:10.18632/oncotarget.3924), 2015-04-23
Supplement: oncotarget-06-17753-s001.pdf [file oncotarget-06-17753-s001.pdf]

## **miR-514a regulates the tumour suppressor NF1 and modulates BRAFi sensitivity in melanoma**

### **Supplementary Material and Methods**

#### *Cell Culture and Total RNA extraction*

Ethical approval was granted by the QIMR Berghofer's Human Research Ethics Committee (HREC) approval number P1237.

All melanoma (cutaneous and uveal) cell lines (Supp Table 3) were established and have been previously described (Dutton-Regester *et al.*, 2012; Pavay *et al.*, 2004). All other solid cancer cell lines (Supp Table 3) were kind donations from investigators at QIMR Berghofer. Most of the solid cancer cell lines are available from the cell line repositories ATCC or CellBank Australia.

All cell lines were cultured in RPMI (#31800-089, Life Technologies, Foster City, CA, USA) supplemented with 10% FBS (Life Technologies, Foster City, CA, USA), HEPES, 100 U/ ml penicillin and 100 µg/ml streptomycin (Life Technologies, Foster City, CA, USA ) and incubated at 37°C (5% CO<sub>2</sub>). All cell lines were periodically authenticated via short tandem repeat profiling according to the manufacturer's instructions (AmpFISTR Profiler Plus ID kit; Life Technologies, Foster City, CA, USA). Primary human melanoblasts (QF1160MB) and melanocytes (MELA) were established from human neonatal foreskin and cultured as described (Cook *et al.*, 2003; Leonard *et al.*, 2003). Cells were harvested from the plate and column-purified using the miRNeasy Kit (QIAGEN, Hilden, Germany) according to the manufacturer's instructions.

### *Serum/plasma collection and Total RNA extraction*

Serum and plasma were processed using standard methodologies and Total RNA was extracted using the Plasma/Serum Circulating RNA Purification Kit (#30000; Norgen Biotek, Ontario, Canada) according to manufacturer's instructions.

### *microRNA microarray profiling and data analysis*

5 µg of Total RNA was shipped to LC Sciences (Houston, USA) for miRNA profiling using a custom array platform (µParaflo® technology) containing 1898 miRNAs (miRBase V18)(Griffiths-Jones *et al.*, 2006). All QC, labeling (Cy-3), hybridization, scanning, signal background subtraction and global normalization (LOWESS) were performed by LC Sciences as per technical note: ([www.lcsciences.com/documents/application-notes/Tech-Bull-MicroRNA-Microarray-Data-Analysis.pdf](http://www.lcsciences.com/documents/application-notes/Tech-Bull-MicroRNA-Microarray-Data-Analysis.pdf)).

Advanced data analyses were performed in Genespring GX12.5 (Agilent Technologies, Santa Clara, USA) using the LOWESS normalized signal intensity values. All values <30 were considered 'background expression' (*personal communication* with LC Sciences) and changed to 0.01 prior to log<sub>2</sub> transformation. So as to identify 'melanocyte-specific' miRNAs that were potentially more relevant to melanoma, samples were classified as either 'melanoma' or 'other cancers' (melanocytes, melanoblasts, nevocyte, and serum derived samples were excluded from these categories). To identify differentially expressed miRNAs, a Mann-Whitney U-test (unpaired) was applied to a 'volcano-plot' analysis with thresholds set at p<0.05 and ≥2 fold. The gene list derived from these analyses was then applied to all samples in an unsupervised manner using hierarchical clustering (Euclidean similarity with average linkage).

### *miScript quantitative RT-PCR validation*

Briefly, all samples included on the microarray along with an extended cohort of melanoma cell lines (as described in (Boyle *et al.*, 2011)) were reverse transcribed using the miScript II RT Kit (QIAGEN, Hilden, Germany) according to the manufacturer's instructions. Real-time PCR was subsequently performed with a miScript SYBR Green PCR Kit (QIAGEN, Hilden, Germany); with the miRNA primer assays (QIAGEN, Hilden, Germany) hsa-miR-211-5p (#MS00003808), hsa-miR-514-3p (#MS00031948), and RNU-6 (#MS00033740), using the 7900HT Fast Real Time PCR System (Life Technologies, Foster City, CA, USA). Data were analyzed in Microsoft Excel using the  $\Delta$ CT method compared to RNU6 which was assessed in every sample.

### *MITF inducible melanoma cell lines and lineage-specific miRNA Taqman Assays*

RNA from the MITF inducible cells was used as templates for Taqman miRNA-specific cDNA synthesis as per manufacturer's instructions (Life Technologies, Foster City, USA). Taqman miRNA assays were performed using miRNA-specific primers for miR-211-5p (000514), miR-514a-3p (001147), miR-204-5p (000508), miR-506-5p (001050), miR-508-3p (001052), miR-509-3p (002236), and miR-509-5p (002235) (along with RNU6 (001973) as an endogenous control) using the 7900HT Fast Real Time PCR System (Applied Biosystems, Foster City, USA) as per manufacturer's instructions. Data were analyzed in Microsoft Excel using the  $\Delta$ CT method compared to RNU6 which was assessed in every sample. The  $\Delta\Delta$ CT was then applied with the induced cell line (MITF and LacZ inducible (control)) and the Negative non-induced cell lines (MITF and LacZ non-induced (control)). An 'array expression-like value' was produced by using  $\Delta\Delta$ CT<sup>2</sup>.

### *Biotin pull-downs and microarray hybridizations and data analysis*

Synthetic biotinylated microRNA-duplexes were designed for miR-514a (Sequence 1: /5Phos/rUrArCrUrCrUrGrGrArGrArGrUrGrArCrArArUrCrArCrG Sequence 2: /5Phos/rArUrUrGrArCrArCrUrUrCrUrGrUrGrArGrUrArGrA/3Bio/) along with a scrambled control (Sequence 1: /5Phos/rUrArUrCrCrCrCrUrUrUrGrCrCrUrGrCrUrUrUrUrCrC/3Bio/ Sequence 2: /5Phos/rUrArArGrCrUrArGrArCrCrGrGrArGrGrArGrGrGrC) according to specifications detailed in the methodology devised by Cloonan and colleagues (Martin *et al.*, 2014; Wani and Cloonan, 2014) and purchased from Integrated DNA Technologies (Coralville, USA). A step-by-step methodology (Wani and Cloonan, 2014) was followed with the following exceptions optimized to specific melanoma cell lines: Lyophilized miRNA duplexes were resuspended to a final concentration of 50  $\mu$ M. 500,000 cells in 2.5mls of media (RPMI/10% FBS/no PenStrep) were seeded into 9-wells of 6-well plates (i.e. 1.5 plates). 1.8  $\mu$ L of each 50  $\mu$ M duplex (miR-514a and miR-Scr-control (NEG-scr)) was added to 500 $\mu$ L of Opti-MEM® I (Life Technologies, Foster City, USA) and 4  $\mu$ L of Lipofectamine® 2000 (Life Technologies, Foster City, USA) per well and allowed to incubate for 20mins. 500  $\mu$ L of transfection mix was then added to each well. Precise modifications of the Cloonan protocol (Wani and Cloonan, 2014) are detailed in the Supplementary Methods below.

Biotinylated cRNA was prepared with the Illumina TotalPrep RNA Amplification Kit (Ambion, Austin, TX, USA). Labelled cRNA was hybridized to HumanHT-12 v4 BeadChip Arrays (Illumina Inc, San Diego, CA, USA), and then washed and scanned according to standard Illumina protocols. Data were extracted in GenomeStudio (Illumina) using default analysis settings and no normalization method. Resulting data were imported

into GeneSpring GX v12.5 (Agilent Technologies, Santa Clara, CA, USA). Expression values were normalized using quantile normalization with default settings.

The gene-lists were filtered firstly by the following criterion: present in at least 2 cell-lines with a fold change of >1.3 fold up-regulated as compared to Neg-Scr. Next, using PubMatrix (<http://pubmatrix.grc.nia.nih.gov/>) the following keywords were used to find associations: 'Melanoma', 'BRAF', 'MITF', and 'proliferation'.

### **Biotin pull-downs and microarray step-by-step methods**

Biotin pull-downs and microarray hybridizations were modified to work with existing transfection conditions for melanoma cell lines. The protocol follows a step-by-step guide which was originally published by the Cloonan lab (Martin *et al.*, 2014; Wani and Cloonan, 2014).

### **MATERIALS & REAGENTS**

- Cell line of choice
- Fetal Bovine Serum
- Phosphate Buffer Saline
- Opti-MEM ® Reduced Serum Media
- Transfection Reagent
- Biotin tagged miRNA duplexes (Integrated DNA Technologies)
- Dynabeads ® MyOne Streptavidin C1 (Invitrogen cat. no. 650-01)
- Buffer Kit (Ambion cat.no. AM9010)
- Sigma-IGEPAL ® CA-630 (Sigma Aldrich cat. no. I8896)
- DL-Dithiothreitol
- Yeast tRNA (Invitrogen cat.no.15401-011)
- Bovine Serum Albumin (BSA)

- SUPERase•In™ (Ambion cat. no.AM2694)
- Complete Mini Protease Inhibitor EDTA free (Roche cat.no. 11836170001)
- RNase/DNase free water
- RNeasy kit
- Illumina ® TotalPrep RNA Amplification kit (Ambion cat. no. AMIL1791)
- Illumina HumanHT-12 v4 Expression BeadChip.

- Dry Ice

### **EQUIPMENT**

- Cell scrapers
- 6-well tissue culture plates (P6)
- Centrifuge capable of spinning 50mL falcon tubes at 1000g
- 50mL Falcons
- Rotating mixer
- DynaMag™-2 magnet; magnetic separator (Life technologies cat. no. 123-21D)
- Bench top Microcentrifuges; one set at 4°C and one at room temperature, both should be capable of doing at least 10,000g
- Eppendorf LoBind® tubes; 1.5mL
- Nanodrop 1000 spectrophotometer (Thermo Scientific)
- Illumina Bead Array Reader.
- Filter tips (10ul, 20ul, 200µl and 1000µl)

### **REAGENT SET UP**

- Biotin tagged miRNA duplexes: Resuspend lyophilized miRNA duplexes to a final concentration of 200uM. Make working dilution at 50uM.

▲ **CRITICAL** Repeat freeze thaw cycles should be avoided.

- Bead Wash Buffer (Once prepared is stable at room temperature for several months):

5mM **Tris-Cl pH 7.5**

0.5mM **EDTA**

1M **NaCl.**

- Solution A (Once prepared is stable at room temperature for several months):

0.1M **NaOH**

0.05M **NaCl** in RNase/DNase free H<sub>2</sub>O.

- Solution B (Once prepared is stable at room temperature for several months):

0.1M **NaCl** in RNase/DNase free H<sub>2</sub>O.

- Bead Blocking Solution: Prepare RNase/DNase free water containing

1ug/μL **BSA**

1ug/μL **Yeast tRNA.**

▲ **CRITICAL** This solution must be made fresh on the day of use.

- Cell Lysis Buffer : Prepare a solution with final concentrations of the following in

RNase/DNase free

H<sub>2</sub>O

10mM **KCl,**

1.5mM **MgCl<sub>2</sub>,**

10mM **Tris-Cl pH 7.5,**

5mM DTT,  
0.5% Sigma-IGEPAL ® CA-630,  
**60U/ML SUPERase•In and**  
**1x Complete Mini protease inhibitor.**

▲ CRITICAL SUPERase In and PIC must be added on the day of use. Then, the solution must be kept on ice at all times.

• Wash Buffer: Prepare a solution with final concentrations of the following in RNase/DNase free

H<sub>2</sub>O

10mM KCl,  
1.5mM MgCl<sub>2</sub>,  
10mM Tris-Cl pH 7.5,  
5mM DTT,  
0.5% Sigma-IGEPAL ® CA-630,  
**60U/ML SUPERase•In,**  
**1x Complete Mini protease inhibitor**

▲ CRITICAL This solution must be made fresh on the day of use and must be kept on ice at all times.

## **PROCEDURE**

### **Step 1-6: Transfecting the Biotin tagged miRNA duplexes into cells. (Day 1)**

● TIMING 24.5 h, 30 mins hands-on

1. For each miRNA to be tested, seed  $5 \times 10^5$  cells in 2.5mL media + 10% FCS, no Pen/strep per P6 (at least 8-9 P6 per point tested).



Optional: Set up 1x P6 dish with  $5 \times 10^5$  cells as a mock transfection control if desired.

2. Prepare the transfection mix according to the classical Lipofectamine protocol (Mix1 = 1.8ul of miRNA duplex 50uM + 250ul Optimem, Mix2 = 4ul Lipofectamine + 250ul Optimem).

3. Incubate each mix separately for 5min at room temperature.

4. Mix 1 + 2 and Incubate at room temperature for 20min to allow the transfection complexes to form.

5. Add 500ul of the transfection complexes to each of the P6. Swirl the plate gently to ensure that the complexes are distributed uniformly across the plate.

6. Incubate the cells with the transfection complexes at 37°C and 5% CO<sub>2</sub> for **24 h**.

**Step 7-20: Bead washing and blocking.** Bead preparation can be started on the day of transfection (day 1) on a rotating mixer at 4° overnight, or can be done on the day of cell harvesting (day 2) for 2 h at room temperature.

● TIMING 17.5 h if started on day 1, 2.5 hs if started on day 2, 30 mins hands-on

7. Resuspend Dynabeads ® MyOne Streptavidin C1 in its bottle by vortexing. Transfer 200µL (**100µL of bead suspension per point**) to a 2mL LoBind tube.

8. Place the tube with the bead suspension on the DynaMag™-2 magnet for 2 minutes.

9. Using a pipette, aspirate and discard supernatant before removing tube from the DynaMag™-2 magnets.

10. Add **200µl of bead wash buffer** to the beads. Pipette several times to ensure the beads are washed sufficiently.

11. Repeat steps 8 -10 twice more for a total of three washes.

12. RNase Freeing Beads: After the third wash resuspend the beads in **200µl Solution**

**A.** Mix well by pipetting several times. Let beads incubate **at room temperature for 2 minutes**.

13. Place the tube containing the bead solution on the DynaMag™-2 magnet for 2 minutes.
14. Using a pipette, aspirate and discard supernatant before removing tube from the DynaMag™-2 magnets.
15. Repeat steps 12-14 once more.
16. Resuspend beads in **200µl Solution B**. Mix well by pipetting several times.
17. Place the tube containing the bead solution on the DynaMag™-2 magnet for 2 minutes.
18. Using a pipette, aspirate and discard supernatant before removing tube from the DynaMag™-2 magnets.
19. Resuspend beads in **400µl Bead blocking solution**. Pipette several times to mix.
20. Place the tube containing the bead **on a rotating mixer at 4°C overnight** if starting on day 1, or  
allow mixing at room temperature for 2h if starting on day 2.

### **Steps 21- 36 Harvesting and lysing transfected cells (Day 2)**

- TIMING 1 h , 30 mins hands-on
21. Prepare cell Lysis Buffer and keep buffer on ice till required.  
▲ CRITICAL this buffer must be made fresh on the day of use.
  22. Retrieve transfection plates from step 6 of the protocol. Aspirate and discard media.
  23. To each P6 well, add 1 mL of PBS and using a cell scraper gently lift off the cells from the plate.
  24. Using a pipette transfer the cells to a 50mL falcon tube. Note: Cells from each of the 9xP6 should be pooled at this stage.
  25. Centrifuge the falcon tubes containing the harvested cells at 1800rpm for 5 minutes at room temperature.

26. Aspirate and discard the supernatant. Add 1mL of PBS to the cell pellet and then pipette gently to wash and resuspend the cells. Transfer into a 1.5ml Eppendorf tube.

27. Centrifuge the tube at 10 000rpm for 5 minutes at room temperature.

28. Aspirate and discard supernatant.

29. Add 150µl cell lysis buffer to each pellet and gently pipette to resuspend cells.

30. Put cells in lysis buffer at -80°C for 20 mins.

31. Allow the cells to thaw out at room temperature.

▲ CRITICAL this freeze thaw step allows for better lysis of cells.

32. Centrifuge tube at 13,000rpm in a bench top centrifuge set at 4°C for 5 minutes.

33. Transfer the cleared cell lysate to a clean 1.5mL LoBind tube, leaving behind the soft pellet. The final volume of cleared lysate should be ~140µl-150ul.

34. Transfer 20µL of this cleared lysate to a clean 1.5mL LoBind tube and keep on ice.

This lysate will serve as the control lysate RNA which can be extracted with the miRNeasy mini kit (elution in 30µl).

Note: If processing a mock transfected control, carry out steps 22-33 of protocol on the mock transfection plate and keep mock control lysate on ice for later use.

35. Add **NaCl** to the cleared lysate to give a final concentration of **1M**. For example, add 32.5µL of

5M NaCl to 130µL of lysate, giving a final concentration of 1M NaCl in 162.5ul.

36. Place the tube containing cleared lysate and NaCl on ice.

### **Steps 37-44 Bead Preparation**

● TIMING 15 mins, 15 mins hands-on

37. Prepare wash Buffer and keep buffer on ice till required.

▲ CRITICAL This buffer must be made fresh on the day of use.

38. Place the tube with the beads from step 20 on the DynaMag™-2 magnets for 2 minutes.

39. Aspirate and discard supernatant using a pipette.

40. Add **200µl of wash buffer** and Resuspend beads by pipetting several times.

41. Place tube on the DynaMag™-2 magnets for 2 minutes.

42. Aspirate the supernatant using a pipette and discard. Remove the tube from the DynaMag™-2 magnets.

43. Repeat steps 40-42

44. Resuspend beads in **600µl of wash buffer**.

#### **Steps 45-52 Target mRNA capture and post capture bead washing**

● TIMING 45 mins, 15 mins hands-on

45. Add the **130µl cell lysate + NaCl** from step 36 to the **100µl prepared beads** from step 45. Place tubes **on a rotating mixer at room temperature and incubate for 45 minutes**.

46. Place the tube containing the cell lysate + Beads on the DynaMag™-2 magnets for 2 minutes.

47. Aspirate supernatant using pipette and discard. Remove the tube from the DynaMag™-2 magnets.

48. Wash beads in **100µl wash buffer**. Mix well by pipetting several times.

49. Place the tube containing Beads + wash buffer on the DynaMag™-2 magnets for 2 minutes.

50. Aspirate supernatant using pipette and discard. Remove the tube from the DynaMag™-2 magnets.

51. Repeat steps 48 -50 three times.

▲ **CRITICAL** These washes are essential and are important for the removal of non-specifically bound products from the beads.

52. Once the washes are complete, resuspend the beads in **30µL of RNase/DNase free H<sub>2</sub>O**, store on ice and proceed immediately to the next step.

▲ **CRITICAL** The target mRNAs are captured on these beads. Do not discard.

### **Steps 53-59 Target mRNA and control lysate RNA purification**

● **TIMING** 1 h, 30 mins hands-on

53. Target mRNAs are purified off the Dynabeads® MyOne Streptavidin C1 using a **Qiagen RNeasy kit** according to manufacturer's RNA clean-up protocol. RNA should be eluted twice in 30µl RNase/DNase free water. The final volume of RNA will be 60µl.

54. Alongside the captured target mRNAs also purify the control lysate RNA from step 34 of this protocol. Make up the volume of the control lysate to 100µL by adding 90µL of RNase /DNase free water. Purify the control samples using a Qiagen miRNeasy kit according to manufacturer's RNA clean-up protocol. The control RNA can be eluted in 30-50µL of RNase/DNase free water.

■ **PAUSE POINT** Samples can now be stored at -80°C. Alternatively, continue with quantification of RNA.

### **Step 60 Target mRNA and control RNA Quantification**

● **TIMING** 45mins, 20 mins hands-on

60. The target mRNA and the control lysate RNA can now be quantified on the Nanodrop 1000 spectrophotometer and on an Agilent 2100 Bioanalyser using the Agilent RNA 6000 Pico kit using manufacturer's protocol.

■ **PAUSE POINT** Samples can now be stored at -80°C or continue on with RNA amplification.

### **Step 61- 62 Target mRNA Labeling and Amplification**

- TIMING 23 h, 2 h hands-on

61. Amplify and label 160-500ng of captured target mRNA using Illumina® TotalPrep RNA Amplification kit according to manufacturer's instructions. Also amplify and label 160-500 ng of control RNA.

▲ CRITICAL Carry out the 16 hour incubation for the IVT step.

62. Quantify the amplified RNAs on the Nanodrop 1000 spectrophotometer.

### **Step 63-65 Hybridization of samples onto Illumina® Human HT-12 array and scanning**

- TIMING 18 h s, 2 h s hands-on

63. Hybridize 750ng of amplified cRNA onto an Illumina® Human HT-12 array following manufacturer's protocol.

64. Scan the arrays using an Illumina BeadArray Reader.

65. Extract the expression measurements using the GenomeStudio software.

#### *Site-directed mutagenesis and dual-luciferase reporter assays*

Putative binding sites were identified using the miRanda target prediction software (version August 2010)(Enright *et al.*, 2003). A partial sequence of the cDNA of NF1 (NF1; NM\_000267) from positions 1279–3542, which includes two putative miR-514a-binding sites (site 1 in exon 9, 1342-1360bp; site 2 in exon 23, 3420– 3435 bp), flanked by *AvrII* sites, was cloned into the pGL4.10 vector (Promega, Madison, WI, USA) downstream of the luciferase gene. Site-directed mutagenesis of the putative binding sites was carried out using a QuickChange II XL site-directed mutagenesis kit (Stratagene, CA, USA). Melanoma cell lines with endogenous expression of miR-514a (C-32, MM253, and HT144) were seeded onto 96-well plates at 25 000 cells per well and

co-transfected with 400 ng of pGL4.10 NF1 WT, Ex9\_Mut, Ex23\_Mut or both vector and 20 ng pGL4.75 expressing Renilla luciferase. Luciferase activity was measured using the Dual-Luciferase Reporter Assay System as per the manufacturer's instructions (Promega, Madison, WI, USA). Firefly luciferase activity was normalized to corresponding Renilla luciferase activity and expressed as a percentage of the control. To confirm that the mutated binding sites were related to miR-514a expression, MM253 and HEK293T was co-transfected with 5 nM of miR-514a-3p mimic or Negative Allstars control (miR-Neg-scr) (QIAGEN, Hilden, Germany) along with 400 ng of pGL4.10 NF1 WT and pGL4.10 NF1 Mut (Ex9 and Ex23) and 20 ng pGL4.75 expressing Renilla luciferase.

*Transient transfection of miRNA mimics, miRNA inhibitors, siRNAs and cell viability assays*

A highly efficient transfection reagent allows the use of low amounts of mimic thus reducing the possibility of off-target effects. Adding too much miRNA mimic can overload the RNA-induced silencing complex (RISC)(Khan *et al.*, 2009)

miR-514a-3p mimic (#MSY0002883), Negative Allstars control (#1027280; miR-NEG-scr), and siRNAs (FlexiTube GeneSolution GS4763 for NF1) were purchased from QIAGEN (Hilden, Germany). miRNA inhibitors (miRCURY LNA™ microRNA Power Inhibitors # 427206-04 and 199020-04) were purchased from Exiqon (Vedbaek, Denmark). A final concentration of 5 nM of mimic, siRNAs and Negative control and 50 nM of LNA's were reverse-transfected into melanoma cell lines (30,000 cells/6-well and 4,000 cells/well; MM96L and MM253 using Lipofectamine® RNAiMAX (Life Technologies, Foster City, USA) and harvested for RNA, protein at 72 hrs or measured for cell viabilities 6-days post transfection (equal to 5 days post BRAFi addition).

Melanoma cell lines were selected based upon transfection ability along with having detectable (by Western blot) endogenous NF1 protein levels (data not shown). NF1 mRNA expression was determined (relative to RNU6) using a QuantiTect Primer Assay (#QT00065016; QIAGEN) as described previously. Cell viability assays were performed and determined using a modified sulforhodamine B (SRB; Sigma, St Louis, USA) assay (Vichai and Kirtikara, 2006). Briefly, siRNAs, miRNA mimic, Negative control or LNA's were reverse-transfected with melanoma cell lines and seeded into a 96-well plate then incubated at 37°C with 5% CO<sub>2</sub> for 24hr. A serial 10-fold dilution series (100 nM-0.01 nM) of PLX4032 (Selleckchem, Houston, USA) in DMSO was added across each plate. Plates were fixed on day 6 with methylated spirits prior to performing the SRB assay and read at 564 nm using a plate reader (Molecular Devices, Sunnyvale, USA).

#### *Western blot and mRNA analysis*

Cells were lysed in ice-cold lysis buffer containing 20 mM HEPES, pH 7.8, 0.42 M NaCl, 0.5% NP40, 25% glycerol, 0.2 mM EDTA, 1.5 mM MgCl<sub>2</sub>, 0.1 mM PMSF and protease and phosphatase inhibitors. Samples (60 µg total protein) were resolved on 4–15% Mini-PROTEAN TGX gels (Bio-Rad, Hercules, USA) and transferred to PVDF membranes using a Trans-Blot®Turbo™ (Bio-Rad, Hercules, USA). The following antibodies were used to detect NF1 (#A300-140A; Bethyl Laboratories, Montgomery, USA) and GAPDH (#2118S, Cell Signaling Technology, Danvars, USA) at 1:1000 and 1:5000 dilutions respectively along with a HRP-linked anti-rabbit secondary at 1:2000 (#7074S, Cell Signaling Technology, Danvars, USA). Cell-cycle and apoptosis related proteins were detected with the following antibodies: rabbit anti-E2F1 (#3742S), rabbit anti-CDK2 (#2546S), mouse anti-cyclin D1 (#2926P) and rabbit anti-BCL2 #2876S (Cell Signaling Technology, Danvars, USA), at 1:1000 dilution. Enhanced chemiluminescence (ECL)



detection of antibody binding was quantified using the Fuji LAS-4000 (GE Healthcare Life Sciences, Buckinghamshire, England).

#### NF1 mRNA expression analysis

RNA was reverse transcribed using the miScript II RT Kit (QIAGEN, Hilden, Germany) using the 'HiFlex' Buffer thus enabling both mRNA and miRNA to be analyzed in the same sample. The primer assays were used as described NF1 (#QT00065016) along with (RNU-6). Real-time PCR was performed and analyzed as previously stated.

## References

Boyle GM, Woods SL, Bonazzi VF, *et al.* (2011) Melanoma cell invasiveness is regulated by miR-211 suppression of the BRN2 transcription factor. *Pigment Cell Melanoma Res* 24:525-37.

Cook AL, Donatien PD, Smith AG, *et al.* (2003) Human melanoblasts in culture: expression of BRN2 and synergistic regulation by fibroblast growth factor-2, stem cell factor, and endothelin-3. *J Invest Dermatol* 121:1150-9.

Dutton-Regester K, Aoude LG, Nancarrow DJ, *et al.* (2012) Identification of TFG (TRK-fused gene) as a putative metastatic melanoma tumor suppressor gene. *Genes Chromosomes Cancer* 51:452-61.

Enright AJ, John B, Gaul U, *et al.* (2003) MicroRNA targets in Drosophila. *Genome Biol* 5:R1.

Griffiths-Jones S, Grocock RJ, van Dongen S, *et al.* (2006) miRBase: microRNA sequences, targets and gene nomenclature. *Nucleic Acids Res* 34:D140-4.

Khan AA, Betel D, Miller ML, *et al.* (2009) Transfection of small RNAs globally perturbs gene regulation by endogenous microRNAs. *Nat Biotechnol* 27:549-55.

Leonard JH, Marks LH, Chen W, *et al.* (2003) Screening of human primary melanocytes of defined melanocortin-1 receptor genotype: pigmentation marker, ultrastructural and UV-survival studies. *Pigment Cell Res* 16:198-207.

Martin HC, Wani S, Steptoe AL, *et al.* (2014) Imperfect centered miRNA binding sites are common and can mediate repression of target mRNAs. *Genome Biol* 15:R51.

Pavey S, Johansson P, Packer L, *et al.* (2004) Microarray expression profiling in melanoma reveals a BRAF mutation signature. *Oncogene* 23:4060-7.

Vichai V, Kirtikara K (2006) Sulforhodamine B colorimetric assay for cytotoxicity screening. *Nature protocols* 1:1112-6.

Wani S, Cloonan N (2014) Profiling direct mRNA-microRNA interactions using synthetic biotinylated microRNA-duplexes. *bioRxiv*.

## **SUPPLEMENTARY TABLE LEGENDS**

### **Supplementary Table 1**

All miRNA genes (n=233) listed have a *P* value  $\leq 0.05$  with a fold change (FC)  $\geq 2$  when 55 melanoma cell lines were compared with 34 other solid malignancies. *P* values were generated using a Mann-Whitney U test (unpaired) with multiple testing corrections

(Benjamini-Hochberg). Normalised expression data of 233 miRNAs genes in all samples present on the microarray. Samples are grouped based upon tissue type. Normalised expression data is conditionally formatted (in Microsoft Excel) to assist in data visualisation.

### **Supplementary Table 2**

All miRNAs genes that were  $\geq 10$  fold up and downregulated from those listed in Supplementary Table 1 are summarized here along with their relevance to melanoma.

### **Supplementary Table 3**

Summary of all cell line names and associated tissue type that were used in the discovery (microarray) and validation cohorts (qRT-PCR).

### **Supplementary Table 4**

List of all genes that we upregulated in 2/2 melanoma cell lines following a biotin-labelled miR-514a duplex pulldown of mRNA transcripts.

### **Supplementary Table 5**

List of all possible binding sites of miR-514 in the NF1 transcript (5'UTR, coding, and 3'UTR) using the miRanda prediction algorithm. Binding threshold is set to 100 (default=140).

### **Supplementary Table 6**

Table of *P* values associated with BRAFi sensitivity for the melanoma cell lines MM96L and MM253 (Figure 5A-B). T-tests were performed with comparisons were made between siNF1 vs miR-514a; siNF1 vs siNF1+miR-514a; siNF1 vs miR-Neg-scr; miR-

514a vs miR-Neg-scr; LNA-miR-514a vs LNA-Neg-scr. All tests were corrected for multiple comparisons using the Sidak-Bonferroni method and those that still remained significant are noted (\*).

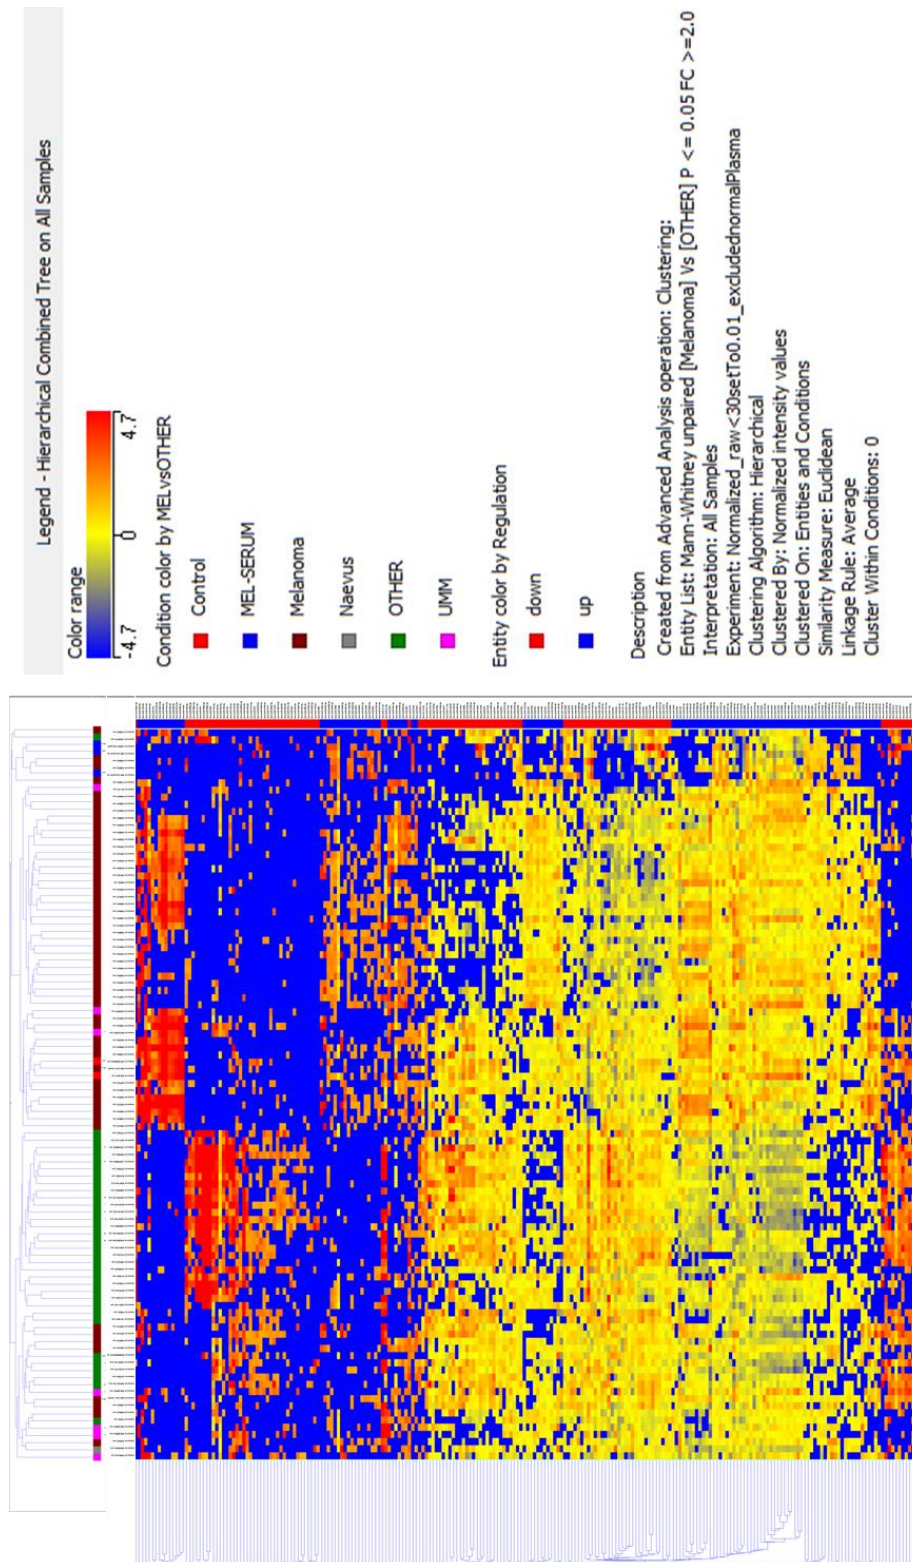

### SUPPLEMENTARY FIGURE 1

Unsupervised hierarchical cluster tree (Euclidean similarity with average linkage) of all miRNA genes and samples (Supplementary Table 1). Distinct separation can be

observed for most melanoma (cutaneous) samples (brown) compared with other solid malignancies (green). Controls (melanocytes and melanoblasts) (red), uveal melanoma (UMM) (pink), melanoma patient-derived serum (blue) and nevocyte (grey) are also present in the tree.

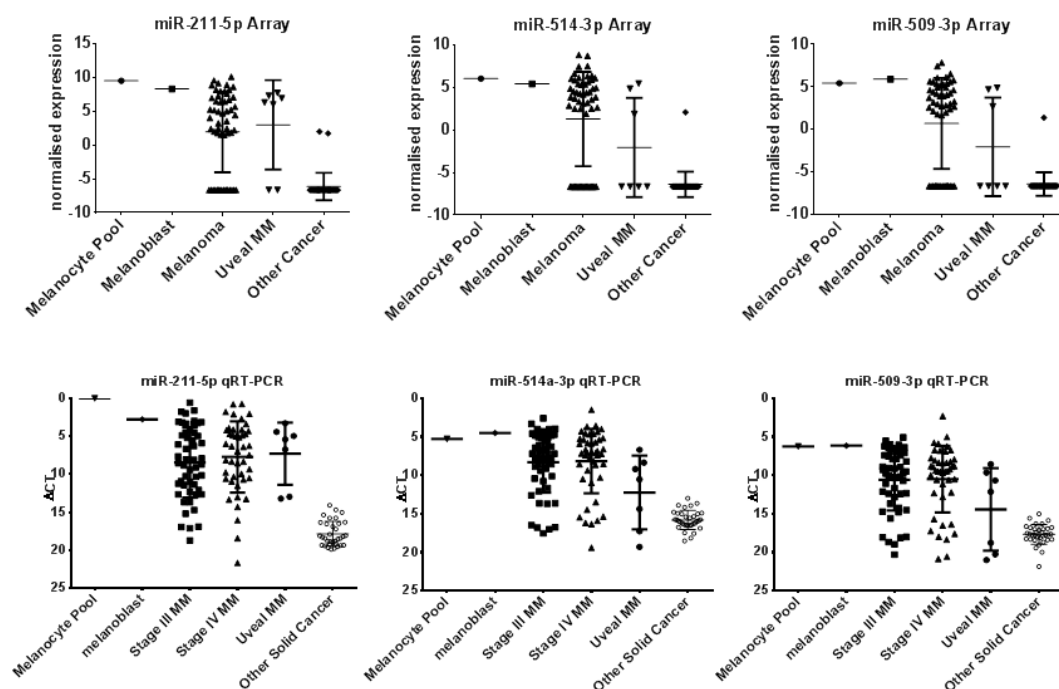

## SUPPLEMENTARY FIGURE 2

The top 3 upregulated miRNAs were validated using qRT-PCR with all samples present on the microarray along with an extended cohort of melanoma cell lines (Supplementary Table 3). For comparative purposes the array data was also plotted to highlight the high correlation between the array and qRT-PCR.

## Supplemental Figure 3

### Genes associated with BRAF inhibitor

ERBB3  
KDM5B  
MCL1  
NFI

### BRAF genes (n=66)

ABCC2 ERBB3 FOP2 THRSF14 ACCS EHZ2  
PDSS1 THRSF25 ADAMTS1 FBXO31 PHUD81  
TSC1 AMT FGR3 PIFLTS2 ARID2 FOS PKD2  
URE2C ATF4 FTL PLA2G4B VANGL2 BIRC3 GJC1  
PLCG1 CAD GLA PLXNB1 CASP2 IL13 PTPRM  
CCDC21 KDM5B RTEL1 CDK2 MAT2A SETD81  
CHFR MCL1 SF3B1 CREB1 MCL1 SLC2A3  
CTNIB1 NST1 SLC4A3 CTSB MUTYH SLC5A8  
CYR61 NFI SFRY4 DIMIT1 NISCH STAT1 DUBP4  
NPAS1 STK19 EZF4 NPAS2 STRADA BEFL1A1  
ORAOV1 TNC

### BRAF assoc. 66

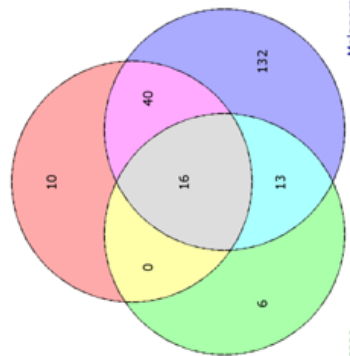

### MITF genes (n=35)

ADAM17 MAFF ASPSCR1 MCL1 ATF4  
MICOLN3 BEST1 NINT BIRC3 NFI GDN2  
PRAME CG68P1 RAB17 CLCN7 RPL32  
COL4A5 SFRY4 CREB1 SREBF1 CROF  
STAT1 CTNIB1 TSC1 ERBB3 TSC2  
EHZ2 TUB FOS ULK1 FZD4 IL18  
KDM5B LDLR LYST

### MITF unique genes (n=6)

ASPSCR1 CG68P1 CLCN7  
FZD4 RPL32 TUB

### BRAF unique genes (n=10)

CCDC21 CHFR GJC1 MAT2A PDSS1  
PIF1 PLA2G4B PTPRM SLC5A8  
THRSF25

### Melanoma genes (n=201)

ABCC2 BRSK1 CTR61 FANCD2 JARID2 MIB2 PBRX7 POLS SLC33A2  
TNC ZBTB20 ABCC5 BTAF1 DDB1 FANCL KDM5B MIKNIK1 P2RY11  
PRAME SLC27A3 THRSF14 ACADVL CAD DDXL1 FBXO31 MF7 NINT  
PAIN2 FRICKLE2 SLC23A3 THRSF6B ACCS CAPS2 DGC88 FCGR3A  
LDLR MPDZ PASK RAB17 SLC4A3 THRSF14 ADAM17 CASP2 DIDO1  
FGR3 LEP MSH5 PCGF2 RAB39B SPIN THRSF15 ADAMTS1 CBS  
DIMP1 FOS LULRB1 NST1 PDCD4 RAD51 SFRY4 TUK2 ADAM CD46  
DIMIT1 FUKLRF8 MTA1 POP2 RAGESREBF1 TOP3B ALB CDK10 DST  
FYLSS MDM1 P6AP1 RAI1 SRGAP2 TP53BP1 AMIT CDK2 DUSP4  
GAK LTB4R MUTYH PHLD81 RBM13 SFA2 TP CN2 ANKRD17 CELSR2  
EZF4 GALT LTRF4 MZF1 PBD1 RRESSTR2 TRAF4 ARFGAP1 CE2  
EEFL1A GBA2 LYST NFI PKD2 R0B03 ST5 TRPM4 ARHGAP1 CIS2  
EFEMP2 GLA MAFF NFKB1Z PLCG1 RPLP0 STAR13 TSC1 ARID2  
COL4A5 BID3 HERPUD1 MAPK12 NISCH PLCXO1 RTEL1 STAT1 TSC2  
ASAP1 COL7A1 BEF2A4 HURNP2B1 MBD1 NDF2 PLOM1 SELO  
STAT2 TUG1 ASXL2 CREB1 EIF3A HSF4 MCL1 NPAS1 PLXNB4  
SEMA3 BEST1 K19 TTK2 ATF4 CROF EIF4A2 HSF4 MCHR2 NPAS2  
PLXNB1 SEMA4 CSTRADA UBE2CATG48 CSEIL ENO2 IFRD1 MCL1  
NRC21 PNM1 SETD81 SYVN1 UBR5 BANP CTNIB1 ERBB3 IL18  
MIC3AP OGT PNP1 TSL1 TAGLN UK1 BEBT1 CTSB EVIS1 ULF3  
MICOLN3 ORAOV1 POLG SF3B1 TARBPF1 VANGL2 BIRC3 COL2 EHZ2  
ITG-AEMIF6E8 OV052 POLG2 SH3PXD2A TIA1 VPS16

### Melanoma unique genes (n=132)

ABCC5 COL7A1 GAK MCHR2 PDCD4 SELO THRSF15 ACADVL CSEIL GALT  
MICM3AP PGAP1 SEMA3 ETKK2 ADAM1 COL2 GBA2 MIF6E8 PKD1 SEMA4 CTOP38  
ALB DDB1 HERPUD1 MIB2 PLCXO1 SFL1 TP53BP1 ANKRD17 DDXL1 HURNP2B1  
MIKNIK1 PLOM1 SH3PXD2A TP CN2 ARFGAP1 DGC88 HSF4 MPDZ PLXNB4 SLC23A2  
TRAF4 ARHGAP1 DIDO1 HSF4 MSH5 PNM1 SLC27A3 TRPM4 ASAP1 DIMP1 IFRD1  
MTA1 PNP1 SFRY4 TUG1 ASXL2 DST1 UFS MUM1 POLG SRGAP2 TTK2 ATG48  
EFEMP2 ITGA4 MZF1 POLG2 SFA2 UBR5 BANP BID3 JARID2 NFKB1Z POLS SSTR2  
VPS16 BRSK1 EIF2AK4 MF7 NDF2 PRICKLE2 ST5 ZBTB20 BTAF1 EIF3A LEP NR2C1  
RAB39B STAR1D13 CAPS2 BEF4A2 LULRB1 OGT RAO51 STAT2 CBS ENO2 LRP8  
OV052 RAGESVW11 CD46 EVIS1 SFRY4 RAI1 TAGLN CDK10 FANCD2 LTB4R  
P2RY11 RBM13 TARBPF1 CELSR2 FANCL LTB4R PAI2 PERE TIA1 CE2 FCGR3A  
MAPK12 PASK R0B03 THRSF6B CIS2 FUK MBD1 PGG2 RPLP0 THRSF14

Lists contain 217 unique elements

### Common genes (n=16)

ATF4 BIRC3 CDK2 CREB1 CTNIB1  
ERBB3 EHZ2 FOS IL18 KDM5B MCL1  
NFI SFRY4 STAT1 TSC1 TSC2

## SUPPLEMENTARY FIGURE 3

The Venn diagram graphically represents the filtered gene lists derived from keyword searches ('Melanoma', 'BRAF', 'MITF') compared to the common 2/2 gene list (Supplementary Table 4).
